# Supplementary material for: The Value of Thromboelastography in the Diagnosis of Sepsis-Induced Coagulopathy
Source: PubMed Central journal article supplement — Clin Appl Thromb Hemost. 2020 Sep 1;26:1076029620951847. doi: 10.1177/1076029620951847 (PMC7469719; doi:10.1177/1076029620951847), 2020-09-01
Supplement: Supplemental_Table_S1._Clinical_Baseline_Characteristics.pdf [file Supplemental_Table_S1._Clinical_Baseline_Characteristics.pdf]

*Supplemental Table S1. Clinical Baseline Characteristics*

---

| item                    | Percentage (%) |
|-------------------------|----------------|
| Male                    | 58.7           |
| Female                  | 41.3           |
| sepsis                  | 50.3           |
| Chronic diseases        | 76.0           |
| Tumor                   | 15.6           |
| Immunosuppressive state | 7.8            |
| Dialysis                | 20.4           |
| Ventilation             | 39.5           |
| Vasopressor             | 35.9           |

---

Percentage = (item cases)/ (total cases) ×100%.
